# Supplementary material for: Helping low-income smokers quit: findings from a randomized controlled trial comparing specialized quitline services with and without social needs navigation
Source: PubMed Central journal article supplement — Lancet Reg Health Am. 2023 Jun 24;23:100529. doi: 10.1016/j.lana.2023.100529 (PMC10319314; doi:10.1016/j.lana.2023.100529), 2023-06-24
Supplement: mmc1.pdf [file mmc1.pdf]

## **Supplementary Materials**

Helping low-income smokers quit: Findings from a randomized controlled trial comparing specialized quitline services with and without social needs navigation

**Table of Contents**

|                                                                                                                                   |   |
|-----------------------------------------------------------------------------------------------------------------------------------|---|
| Supplementary Table 1. CONSORT checklist .....                                                                                    | 3 |
| Supplementary Table 2. Biochemical verification sensitivity analyses of self-reported smoking cessation at 6-month follow-up..... | 4 |
| Supplementary Materials Section 3. Methods for imputing missing data .....                                                        | 5 |

Supplementary Table 1. CONSORT checklist

| Section/Topic                                        | Item No | Checklist item                                                                                                                                                                              | Reported on page No |
|------------------------------------------------------|---------|---------------------------------------------------------------------------------------------------------------------------------------------------------------------------------------------|---------------------|
| <b>Title and abstract</b>                            |         |                                                                                                                                                                                             |                     |
|                                                      | 1a      | Identification as a randomised trial in the title                                                                                                                                           | 1                   |
|                                                      | 1b      | Structured summary of trial design, methods, results, and conclusions (for specific guidance see CONSORT for abstracts)                                                                     | 2                   |
| <b>Introduction</b>                                  |         |                                                                                                                                                                                             |                     |
| Background and objectives                            | 2a      | Scientific background and explanation of rationale                                                                                                                                          | 6,7                 |
|                                                      | 2b      | Specific objectives or hypotheses                                                                                                                                                           | 7,8                 |
| <b>Methods</b>                                       |         |                                                                                                                                                                                             |                     |
| Trial design                                         | 3a      | Description of trial design (such as parallel, factorial) including allocation ratio                                                                                                        | 8                   |
|                                                      | 3b      | Important changes to methods after trial commencement (such as eligibility criteria), with reasons                                                                                          | NA                  |
| Participants                                         | 4a      | Eligibility criteria for participants                                                                                                                                                       | 8                   |
|                                                      | 4b      | Settings and locations where the data were collected                                                                                                                                        | 8                   |
| Interventions                                        | 5       | The interventions for each group with sufficient details to allow replication, including how and when they were actually administered                                                       | 9-11                |
| Outcomes                                             | 6a      | Completely defined pre-specified primary and secondary outcome measures, including how and when they were assessed                                                                          | 12                  |
|                                                      | 6b      | Any changes to trial outcomes after the trial commenced, with reasons                                                                                                                       | NA                  |
| Sample size                                          | 7a      | How sample size was determined                                                                                                                                                              | 13,14               |
|                                                      | 7b      | When applicable, explanation of any interim analyses and stopping guidelines                                                                                                                | NA                  |
| Randomisation:                                       |         |                                                                                                                                                                                             |                     |
| Sequence generation                                  | 8a      | Method used to generate the random allocation sequence                                                                                                                                      | 9                   |
|                                                      | 8b      | Type of randomisation; details of any restriction (such as blocking and block size)                                                                                                         | 9                   |
| Allocation concealment mechanism                     | 9       | Mechanism used to implement the random allocation sequence (such as sequentially numbered containers), describing any steps taken to conceal the sequence until interventions were assigned | 9                   |
| Implementation                                       | 10      | Who generated the random allocation sequence, who enrolled participants, and who assigned participants to interventions                                                                     | 9                   |
| Blinding                                             | 11a     | If done, who was blinded after assignment to interventions (for example, participants, care providers, those assessing outcomes) and how                                                    | 9                   |
|                                                      | 11b     | If relevant, description of the similarity of interventions                                                                                                                                 | NA                  |
| Statistical methods                                  | 12a     | Statistical methods used to compare groups for primary and secondary outcomes                                                                                                               | 14-16               |
|                                                      | 12b     | Methods for additional analyses, such as subgroup analyses and adjusted analyses                                                                                                            | 14,15               |
| <b>Results</b>                                       |         |                                                                                                                                                                                             |                     |
| Participant flow (a diagram is strongly recommended) | 13a     | For each group, the numbers of participants who were randomly assigned, received intended treatment, and were analysed for the primary outcome                                              | 16,17, Figure 1     |
|                                                      | 13b     | For each group, losses and exclusions after randomisation, together with reasons                                                                                                            | 17, Figure 1        |
| Recruitment                                          | 14a     | Dates defining the periods of recruitment and follow-up                                                                                                                                     | 16,17               |
|                                                      | 14b     | Why the trial ended or was stopped                                                                                                                                                          | 13,14               |
| Baseline data                                        | 15      | A table showing baseline demographic and clinical characteristics for each group                                                                                                            | Table               |
| Numbers analysed                                     | 16      | For each group, number of participants (denominator) included in each analysis and whether the analysis was by original assigned groups                                                     | 15,16               |
| Outcomes and estimation                              | 17a     | For each primary and secondary outcome, results for each group, and the estimated effect size and its precision (such as 95% confidence interval)                                           | 17-19               |
|                                                      | 17b     | For binary outcomes, presentation of both absolute and relative effect sizes is recommended                                                                                                 | 17-19, Figure 2     |
| Ancillary analyses                                   | 18      | Results of any other analyses performed, including subgroup analyses and adjusted analyses, distinguishing pre-specified from exploratory                                                   | 17,18               |
| Harms                                                | 19      | All important harms or unintended effects in each group (for specific guidance see CONSORT for harms)                                                                                       | NA                  |
| <b>Discussion</b>                                    |         |                                                                                                                                                                                             |                     |
| Limitations                                          | 20      | Trial limitations, addressing sources of potential bias, imprecision, and, if relevant, multiplicity of analyses                                                                            | 21,22               |
| Generalisability                                     | 21      | Generalisability (external validity, applicability) of the trial findings                                                                                                                   | 21                  |
| Interpretation                                       | 22      | Interpretation consistent with results, balancing benefits and harms, and considering other relevant evidence                                                                               | 19,20               |
| <b>Other information</b>                             |         |                                                                                                                                                                                             |                     |
| Registration                                         | 23      | Registration number and name of trial registry                                                                                                                                              | 3                   |
| Protocol                                             | 24      | Where the full trial protocol can be accessed, if available                                                                                                                                 | 8                   |
| Funding                                              | 25      | Sources of funding and other support (such as supply of drugs), role of funders                                                                                                             | 3,16                |

Supplementary Table 2. Biochemical verification sensitivity analyses of self-reported smoking cessation at 6-month follow-up.

| <i>Outcome</i>             | <i>Four intervention group comparison</i>    |                                                      |                                                 |                                                         | <b>p-value</b> |
|----------------------------|----------------------------------------------|------------------------------------------------------|-------------------------------------------------|---------------------------------------------------------|----------------|
|                            | <b>Standard QL<br/>only<br/><i>n=485</i></b> | <b>Standard QL<br/>+ Navigation<br/><i>n=484</i></b> | <b>Specialized QL<br/>only<br/><i>n=485</i></b> | <b>Specialized QL<br/>+ Navigation<br/><i>n=490</i></b> |                |
|                            | <i>Frequency (%)</i>                         |                                                      |                                                 |                                                         |                |
| Accepted biochemical test  | 64 (13.2)                                    | 40 (8.3)                                             | 63 (13.0)                                       | 58 (11.8)                                               | .06            |
| Completed biochemical test | 20 (4.1)                                     | 9 (1.9)                                              | 14 (2.9)                                        | 15 (3.1)                                                | .23            |
| Cessation confirmed        | 9 (1.9)                                      | 6 (1.2)                                              | 6 (1.2)                                         | 4 (0.8)                                                 | .55            |

### Supplementary Materials Section 3. Methods for imputing missing data

We imputed missing data using the Multivariate Imputation by Chained Equations (MICE) package in R (van Buuren, 2021). Our imputation dataset included baseline data, intervention-use data, and the primary cessation outcome of the study (7-day point prevalence abstinence at 6-month follow-up). All variables included in the imputation dataset are listed below.

Using the MICE package, each variable with missing data had its own imputation model. We used logistic regression to impute the primary outcome variable and all other binary variables with missing data, predictive mean matching for all continuous variables with missing data, proportional odds model imputation for all ordinal variables with missing data, and polytomous logistic regression for all nominal variables with missing data.

We initially generated a set of 20 imputed datasets to test our primary outcome analysis. We used the initial set of imputed datasets and the model results to run the `howmanyimputations` package in R to estimate the minimum number of imputations needed (von Hippel, 2019). Based on the recommended number of imputations from the `howmanyimputations` package, we generated a final set of 95 imputed datasets. We then conducted the primary outcome analysis and per protocol sensitivity analysis using the 95 imputed datasets.

#### References

1. van Buuren S. Multivariate Imputation by Chained Equations v. 3.13.0. 2021. Retrieved from <https://cran.r-project.org/web/packages/mice/mice.pdf>
2. von Hippel P. How many imputations do you need? 2019. Retrieved from <https://statisticalhorizons.com/how-many-imputations>

#### Variables in imputation dataset

- 7-day point prevalence abstinence at 6-month follow-up
- 7-day point prevalence abstinence at 3-month follow-up
- Count of quitline calls
- NRT sent by quitline
- Count of navigation calls
- Gender
- Age
- Race
- Ethnicity
- Income
- Education
- Children  $\leq 18$
- Home smoking ban
- Count of unmet social needs
- PHQ-2 score
- Perceived stress score
- Mean social support
- Insurance status
- Age started tobacco
- Heaviness of smoking

- Use cigars
- Use cigarillos
- Use pipe
- Use smokeless tobacco
- Use e-cigs
- Bought cigarettes for self
- Bought cigarettes for others
- Bummed cigarettes
- Smoked discarded cigarettes
- Ever made quit attempt
- Sleep trouble
- Have personal doctor
- Self-rated health
- Hx of asthma
- Hx of ADHD
- Hx of Bipolar
- Hx of CAD or Heart Disease
- Hx of COPD
- Hx of Cancer
- Hx of Depression
- Hx of Drug or alcohol use disorder
- Hx of Anxiety
- Hx of PTSD
- Hx of Schizophrenia
- Hx of DiabetesTP1
- Hx of DiabetesTP2
- Employment status
- Study group
